# Supplementary material for: The impact of carbon NPs on the accumulation of storage proteins and the generation advancement of the polyphagous insect pest tobacco cutworm Spodoptera litura (Fabricius)
Source: Royal Society of Chemistry journal article supplement (doi:10.1039/d3en00939d), 2024-01-01
Supplement: d3en00939d1.pdf [file d3en00939d1.pdf]

## A. Larval hemolymph protein

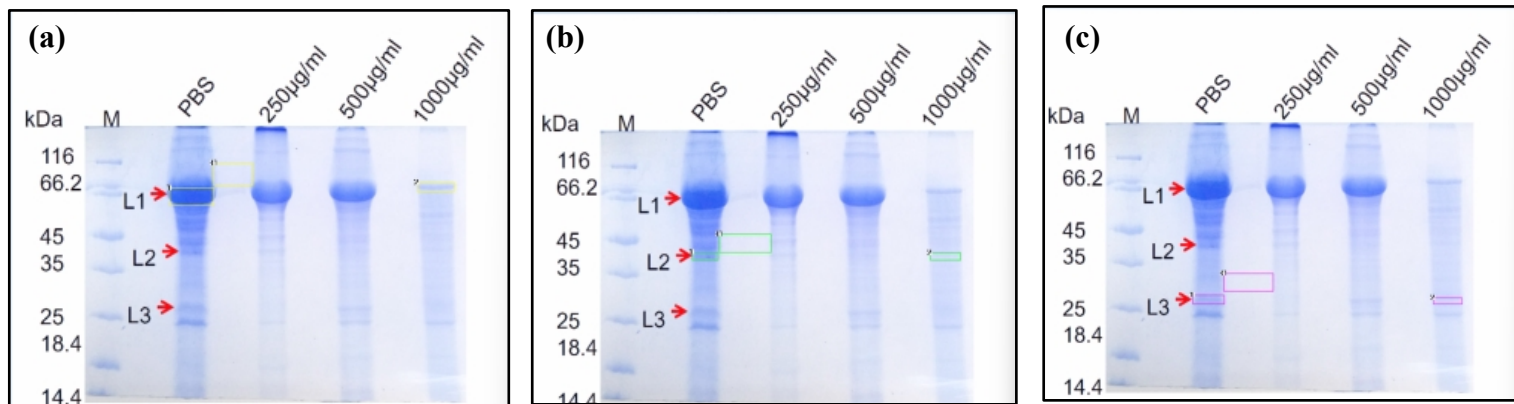

| Fig.No. | Sample         | IDV    | %*    |
|---------|----------------|--------|-------|
| (a)     | PBS L1 (1)     | 963186 | 94%   |
| (a)     | 1000 µg/ml (2) | 61020  | 6%    |
| (b)     | PBS L2 (1)     | 170100 | 83%   |
| (b)     | 1000 µg/ml (2) | 34960  | 17.3% |
| (c)     | PBS L3(1)      | 180873 | 82%   |
| (c)     | 1000 µg/ml (2) | 38220  | 17.4% |

## B. Egg protein

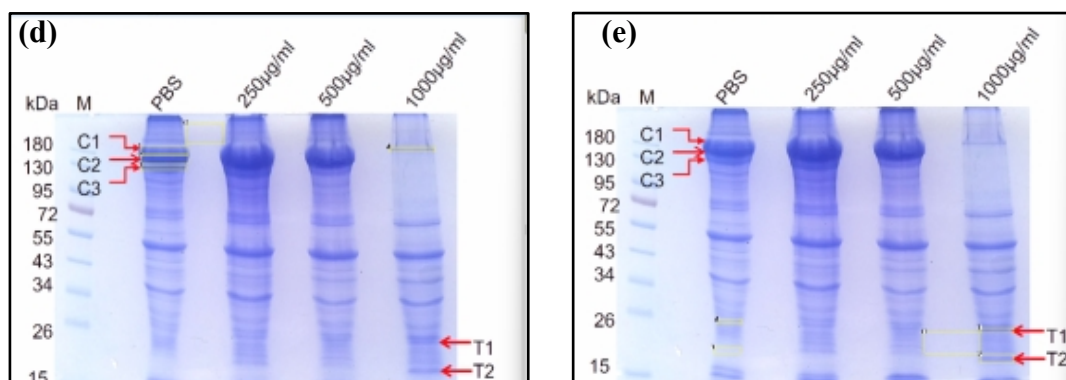

| Fig.No. | Sample            | IDV    | %*    |
|---------|-------------------|--------|-------|
| (d)     | PBS C1(1)         | 460085 | 30.2% |
| (d)     | PBS C2 (2)        | 605375 | 39.8% |
| (d)     | PBS C3(3)         | 320226 | 21%   |
| (d)     | 1000 µg/ml        | 135945 | 9.9%  |
| (e)     | 1000 µg/ml T1(1)  | 96600  | 26.3% |
| (e)     | 1000 µg/ml T2 (2) | 213960 | 58.3% |
| (e)     | PBS (3)           | 27930  | 7.6%  |

### C. Pupal hemolymph protein

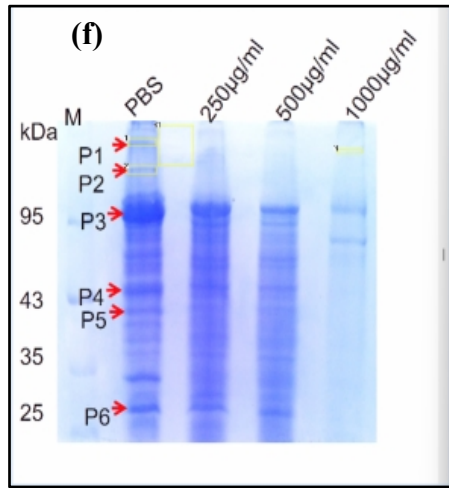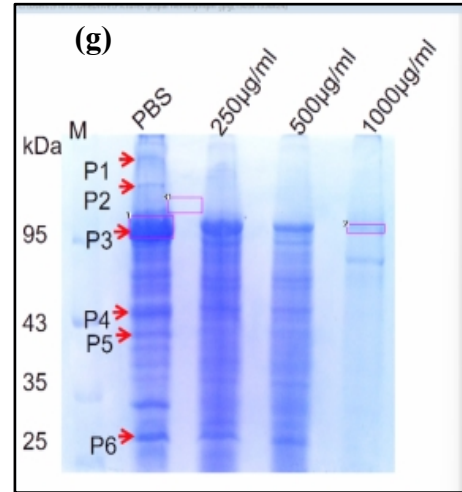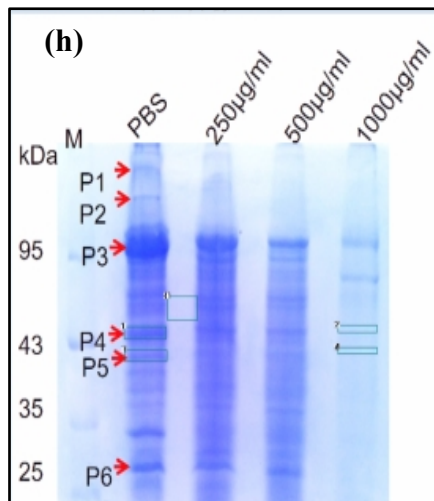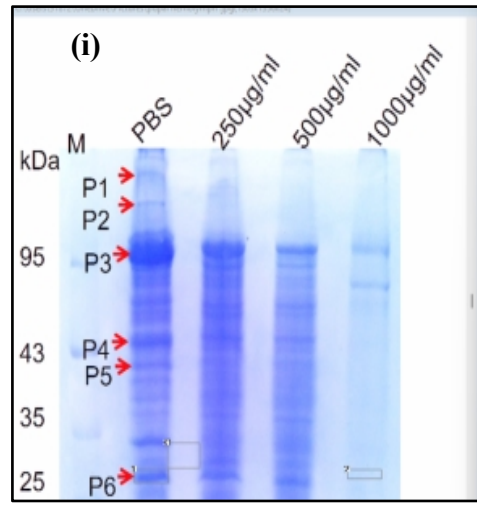

| Fig.No. | Sample         | IDV     | %*    |
|---------|----------------|---------|-------|
| (f)     | PBS P1 (1)     | 152076  | 47.2% |
| (f)     | PBS P2 (2)     | 163254  | 50.7% |
| (f)     | 1000 µg/ml(3)  | 6930    | 2.2%  |
| (g)     | PBS P3 (1)     | 1030839 | 91.6% |
| (g)     | 1000 µg/ml (2) | 94350   | 8.4%  |
| (h)     | PBS P4 (1)     | 328779  | 51.9% |
| (h)     | 1000 µg/ml     | 31395   | 5%    |
| (h)     | PBS P5 (3)     | 255471  | 40.4% |
| (h)     | 1000 µg/ml     | 17480   | 2.8%  |
| (i)     | PBS P6(1)      | 190120  | 88.7% |
| (i)     | 1000 µg/ml     | 24250   | 11.3% |

IDV: Integrated Density Value

\*Based on Integrated Density Value
